# Consideration of genetic and sex effects in mice enhances consistency with human addiction studies

Authors:

Michael C. Saul<sup>1,2</sup>, Jared R. Bagley<sup>2,3</sup>, Lauren S. Bailey<sup>2,3</sup>, Udit Datta<sup>1,2</sup>, Price E. Dickson<sup>1,2,4</sup>, Rainy Dodd<sup>1,2</sup>, Leona H. Gagnon<sup>1,2</sup>, Spencer B. Hugett<sup>5</sup>, Violet M. Kimble<sup>6</sup>, Michael Leonardo<sup>1,2</sup>, Sam-Moon Kim<sup>2,7</sup>, Ashley Olson<sup>1,2</sup>, Tyler Roy<sup>1,2</sup>, Sarah A. Schoenrock<sup>2,8</sup>, Troy Wilcox<sup>1,2</sup>, J. David Jentsch<sup>2,3</sup>, Ryan W. Logan<sup>2,7</sup>, Colleen A. McClung<sup>2,7</sup>, Rohan H. C. Palmer<sup>5</sup>, Vivek M. Philip<sup>1,2</sup>, Laura G. Reinholdt<sup>1,2</sup>, Stacey J. Sukoff Rizzo<sup>1,2,9</sup>, Lisa M. Tarantino<sup>2,8</sup>, and Elissa J. Chesler<sup>1,2,\*</sup>.

Affiliations: <sup>1</sup>The Jackson Laboratory of Mammalian Genetics, Bar Harbor, ME USA; <sup>2</sup>Center for Systems Neurogenetics of Addiction at The Jackson Laboratory, Bar Harbor, ME USA;

<sup>3</sup>Binghamton University Department of Psychology, Binghamton, NY USA; <sup>4</sup>Department of Biomedical Sciences, Joan C. Edwards School of Medicine, Marshall University, Huntington, WV

USA; <sup>5</sup>Behavioral Genetics of Addiction Laboratory, Department of Psychology, Emory University, Atlanta, GA USA; <sup>6</sup>Drew University Department of Neuroscience, Madison, NJ USA;

<sup>7</sup>University of Pittsburgh School of Medicine Department of Psychiatry, Pittsburgh, PA USA;

<sup>8</sup>University of North Carolina-Chapel Hill Department of Genetics, Chapel Hill, NC USA;

<sup>9</sup>University of Pittsburgh School of Medicine Department of Neurobiology, Pittsburgh, PA USA;

<sup>10</sup>University of North Carolina-Chapel Hill Eshelman School of Pharmacy Division of Pharmacotherapy and Experimental Therapeutics, Chapel Hill, NC USA.

\*To whom correspondence should be addressed: [elissa.chesler@jax.org](mailto:elissa.chesler@jax.org)

Keywords: addiction, sex differences, genetics, cocaine, genomics.

## 1 Abstract

2 Concerns about external validity of rodent models and translation of findings across species are  
3 often based on narrow investigations of populations with limited diversity. Sources of individual  
4 variation – including genetics and sex – are only infrequently encompassed in model organism  
5 studies. As with most complex diseases, risk for cocaine use disorder is subject to considerable  
6 inter-individual variation. Explicit inclusion of individual differences in rodent research may  
7 reveal conserved phenotypes and molecular systems relevant to human addiction. We  
8 surveyed cocaine-related traits in both males and females of eight inbred mouse strains whose  
9 genomes collectively capture 90% of the genetic diversity of the mouse species. Across these  
10 strains, individual differences explained a substantial proportion of variance in cocaine-  
11 responsive or cocaine response-predictive behavioral and physiological phenotypes. Wild-  
12 derived mouse strains often extended the phenotypic ranges of these behaviors beyond what is  
13 observed in conventional laboratory strains. Striatum transcriptional responses to cocaine were  
14 also highly dependent upon strain and sex differences; most cocaine-responsive genes were  
15 differentially expressed in a manner moderated by strain, sex, or their combination. We  
16 compared the strain- and sex-mediated transcriptional responses to cocaine in mice to  
17 transcriptomic analysis of people with cocaine use disorder and found that mouse similarity to  
18 humans was highly dependent upon mouse genetic background and sex. Specifically, male  
19 WSB/EiJ mice and female NOD/ShiLtJ mice exhibited the greatest degree of neural  
20 transcriptional consilience with humans with cocaine use disorder. Model organism diversity  
21 thus represents a crucial source of biological information that can substantially improve  
22 external validity of neuropsychiatric research.

## 23 Significance Statement

24 Laboratory mice are widely used in research on neurobiological mechanisms of addiction, but  
25 most studies use a single strain and often sex of mice. To assess how individual differences in  
26 mice modulate addiction-related traits and how this impacts comparative analysis with  
27 humans, we studied cocaine-relevant behaviors and brain molecular correlates in both males  
28 and females of genetically diverse mouse strains. In this population, individual differences  
29 related to sex and/or genetics explain large proportions of differences in cocaine-related traits.  
30 Importantly, brain gene expression data demonstrated that some strains mimic human  
31 genomic states more readily than others. Individual differences thus represent a crucial and  
32 underdeveloped source of biological information about addiction mechanisms that may  
33 influence the translational utility of such studies.

## 34 Introduction

35 Complex diseases such as neuropsychiatric disorders are typically characterized by the  
36 contributions of many genes (Hyman, 2018). Behavioral genetics in non-human animals aims to  
37 establish consilience with psychiatrically relevant human systems by studying conserved  
38 behaviors and their conserved underlying neural molecular substrates. However, despite  
39 mounting evidence of deep conservation in the complex gene systems driving behavior (Saul et  
40 al., 2019a; Sinha et al., 2020; Young et al., 2019), uncertainty about the psychiatric relevance of  
41 non-human animal systems abounds in the psychiatric genetics community (National Advisory  
42 Mental Health Council Workgroup on Genomics, 2018). These doubts likely arise from  
43 longstanding and well-characterized difficulties in replicating non-human animal behavioral  
44 findings (Crabbe et al., 1999) as well as the failure to translate psychiatric genetics results from  
45 any species into the clinic (Hyman, 2012). A critical reassessment of non-human animal  
46 behavioral genetics is needed for non-human animals to contribute to the human psychiatric  
47 literature.

48 To simplify experimental design, rodent behavioral and genomic studies of behavioral traits,  
49 though often quite detailed in their behavioral and biological scope, most often focus their  
50 efforts on identifying individual differences within a single inbred mouse strain for practical  
51 reasons (Pascoli et al., 2018; Walker et al., 2018) or within outbred rat populations that often  
52 ship from multiple vendors (Fitzpatrick et al., 2013), each with their own genetic bottlenecks.  
53 Sex differences are frequently ignored in both human and non-human animal research (Datta et  
54 al., 2020). Experimental methodologies agnostic to these known sources of individual  
55 differences can produce valuable biological insights in some circumstances, but the omission of  
56 sex and genetic variation in these studies limits generalizability without necessarily reducing  
57 experimental noise (Prendergast et al., 2014; Tuttle et al., 2018). Further, using a single inbred  
58 genetic background can suppress behavioral effects observed in even highly penetrant  
59 knockout alleles (Sittig et al., 2016). On the other hand, systematic inclusion of tractable genetic  
60 diversity may allow rodents to not just better emulate clinically relevant characteristics, but to  
61 contribute new genetic paradigms of understanding neuropsychiatric disorders (Neuner et al.,  
62 2019). These important advances in model organism genetics are often ignored in discussions

63 of how to best model neuropsychiatric phenotypes in non-human animals (e.g. Nestler and  
64 Hyman, 2010).

65 As highly prevalent behavioral disorders, substance use disorders drive a public health crisis  
66 associated with substantial morbidity and mortality. Illicit substance use disorders afflict  
67 approximately 1 in 14 young adults in the United States (SAMHSA, 2017) and drug overdoses  
68 are now the leading cause of accidental death among American adults under 55 (Kochanek et  
69 al., 2017). Genetic variation and sex differences are both known to influence addiction  
70 vulnerability; cocaine use disorder is highly heritable ( $H^2 \approx 0.71$ ) (Goldman et al., 2005) and  
71 substance use behaviors show sex differences in both humans and other animals (Becker et al.,  
72 2012; Becker and Chartoff, 2019). Consequently, the neurobiology underlying addiction cannot  
73 be fully understood without consideration of genetic background and sex in both humans and  
74 non-human animals.

75 Given the genetic diversity in the population of inbred mouse strains (Beck et al., 2000) and the  
76 multitude of derived mouse recombinant inbred and heterogeneous stock populations useful  
77 for genetic mapping and trait correlation work (Chesler et al., 2005; Logan et al., 2013; Philip et  
78 al., 2011), it is possible to sample over diverse genotypes and identify strains and sexes that  
79 best mimic the human disease state. Such a strategy can improve translational relevance while  
80 surveying these populations for heritable drivers of unidentified genetic mechanisms of disease  
81 susceptibility. Though rodent genetic variation does not capture precise human variants, it can  
82 be exploited to determine underlying mechanisms in addiction-relevant processes (Bogenpohl  
83 et al., 2017; Huggett et al., 2020; Palmer et al., 2019). As a further benefit, genotypic and  
84 phenotypic precision, along with high minor allele frequencies and in many cases, a well-  
85 randomized population structure, allows genetics studies in rodents to be performed at orders  
86 of magnitude lower cost than human GWAS.

87 To assess the influence of genetic variation, sex, and their potential interactions on cocaine-  
88 related phenotypes in mice, we undertook a large-scale evaluation of behavioral, physiological,  
89 and brain transcriptomic measures in both male and female mice from the eight inbred founder  
90 strains of the Diversity Outbred (DO) mouse heterogenous stock (Saul et al., 2019b). Because  
91 these strains include wild-derived inbred strains from the three dominant subspecies of mice,

92 their genomes together capture approximately 90% of the genetic diversity in the species *Mus*  
93 *musculus* (Roberts et al., 2007). We further assessed how strain and sex differences drive  
94 consilience with human addiction, identifying which strains and sexes capture significant  
95 overlapping brain molecular correlates with human cocaine use disorder.

96 In the eight founder strains for the DO, we surveyed behavioral and physiological correlates of  
97 vulnerability to cocaine use – including multiple novelty response behaviors, circadian  
98 molecular rhythm phenotypes, and reversal learning as a measure of reward learning and  
99 impulsivity. We directly measured cocaine-related behaviors such as initial locomotor  
100 sensitivity to cocaine and intravenous self-administration (IVSA) of cocaine. Finally, using RNA  
101 sequencing (RNAseq), we measured the striatum transcriptome response to cocaine in all eight  
102 founder strains and compared them to a meta-analysis of postmortem brain tissue from  
103 cocaine use disorder patients. Our work represents the first time that many of these behavioral,  
104 physiological, and molecular traits have been studied using methods powered to detect sex and  
105 genotype effects and the extent to which these interact to moderate one another's effects.

## 106 Results and Discussion

107 We first examined heritability, sex differences, and genetic differences moderated by sex  
108 among the founders of the DO. Significant effects are reported in the text; all tests are reported  
109 in **Supplementary Table S1**.

110 Response to novelty predicts psychostimulant addiction-related phenotypes in both humans  
111 (Ersche et al., 2010) and mice (Dickson et al., 2015). We first assessed differences in behavioral  
112 traits related to exploration and response to novelty using the open field, light-dark box, hole  
113 board and novel place preference tests. Though novel place preference heritability was  
114 moderately weak ( $H^2 = 0.16$ ), the other three phenotypes displayed strong to very strong  
115 heritability ( $H^2 = 0.42-0.55$ , **Figure 1A-D**). Further, for the phenotype of total entries in the hole  
116 board test, an exploratory behavior, there was a significant sex difference ( $F_{1,597} = 10.69$ ,  $p =$   
117  $0.0014$ ), which was apparently driven by lower hole board exploration in males than females  
118 for all strains but PWK/PhJ. We detected strain-by-sex interactions in the total entries in the  
119 hole board ( $F_{7,597} = 2.74$ ,  $p = 0.0083$ ) and in the proportion of distance traveled in the center of

120 the open field ( $F_{7,684} = 2.09$ ,  $p = 0.043$ ), indicating that sex differences in these novelty response  
 121 traits are moderated by genetic background. Total entries in the hole board (**Figure 1A**) and  
 122 novel place preference (**Figure 1B**) exhibited extended range due to the inclusion of wild-  
 123 derived strains, demonstrating that wild-derived genetic variability functions in defining an  
 124 expanded phenotypic range (Wahlsten et al., 2003). Transitions between the sides of the light-  
 125 dark box also showed phenotypes toward the extreme in wild-derived mouse strains along with  
 126 NOD/ShiLtJ mice (**Figure 1D**).

127 Circadian rhythm and reward-related behavioral phenotypes are co-inherited and rhythm  
 128 disruptions are linked to development and progression of substance use disorders (Logan et al.,

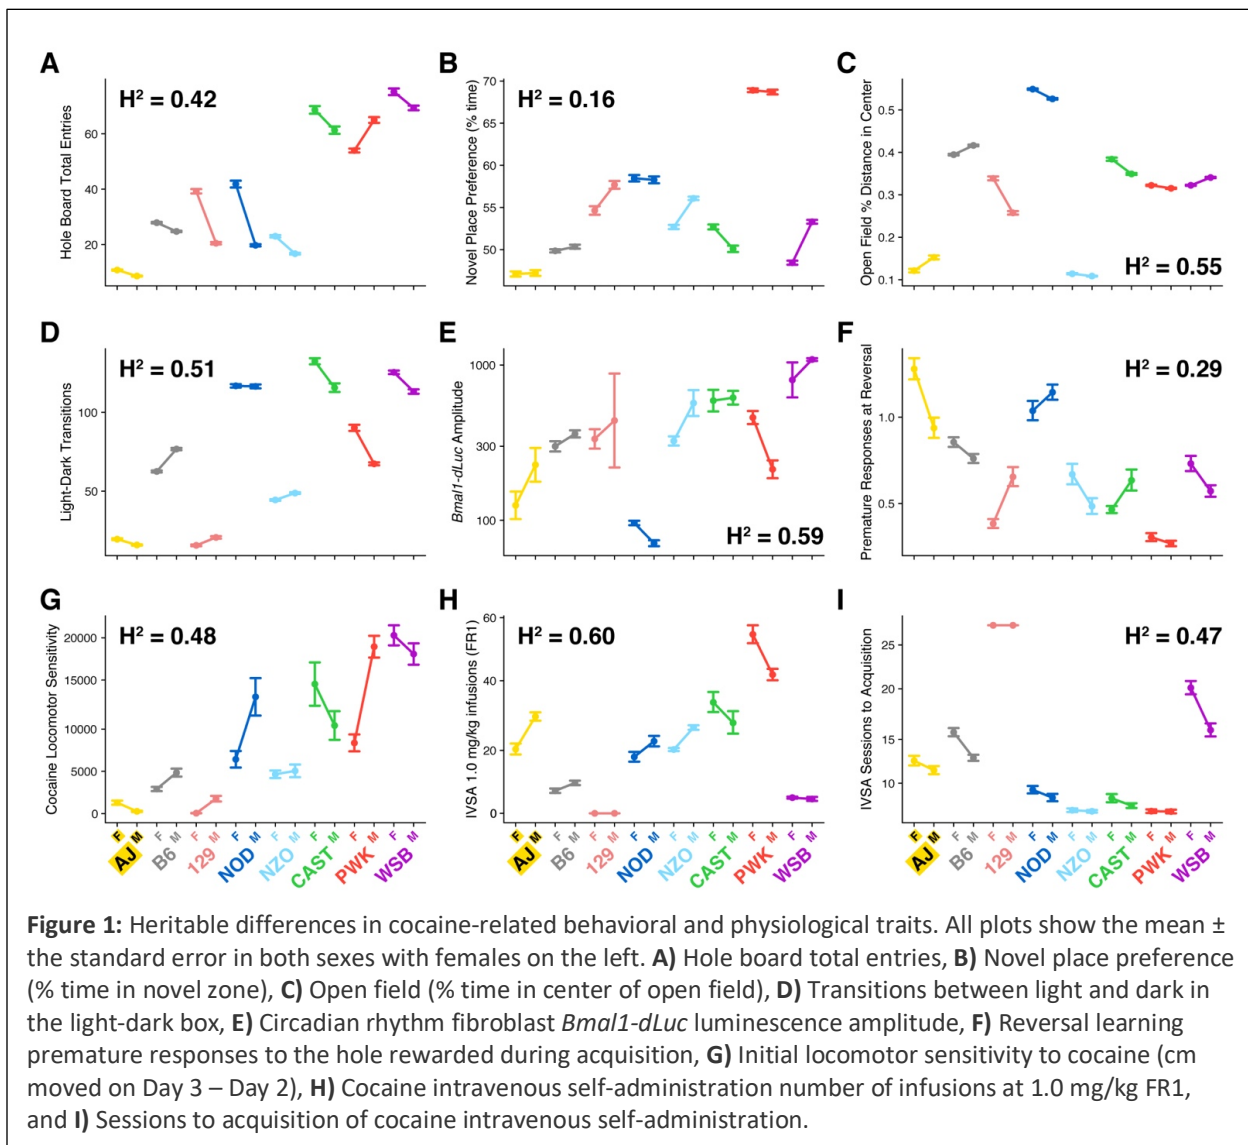

129 2014). Further, the molecular clock system directly influences the expression of dopamine  
130 receptors in the striatum involved in the modulation of cocaine reward-related behaviors  
131 (Ozburn et al., 2015). A cell-based assay on fibroblasts derived from each of the founder strains  
132 in which a *Bmal1-dLuc* reporter was utilized for circadian measurement of luciferase  
133 bioluminescence to assess differences in circadian rhythmicity (Kim et al., 2016; Ramanathan et  
134 al., 2014). We found very high heritability of the amplitude of these rhythmic patterns ( $H^2 =$   
135 0.59, **Figure 1E**), but no significant sex differences or strain x sex interactions. These results  
136 suggest that genetic differences in the molecular clock are one potential mechanism for  
137 individual differences in addiction-related phenotypes.

138 Reversal learning tasks evaluate impulsive and compulsive behaviors that predict addiction  
139 liability (Izquierdo and Jentsch, 2012). Within reversal learning paradigms, one measure of  
140 impulsivity is the number of premature responses produced during the reversal phase of the  
141 task. This phenotype is similar to an impulsivity-related measure implemented in the five choice  
142 serial reaction time task (Dalley et al., 2007). Premature reversal responses in our study showed  
143 moderate heritability across our eight strains of mice ( $H^2 = 0.29$ , **Figure 1F**), but no significant  
144 sex differences or strain x sex interactions. We observed the lowest rate of premature  
145 responding in the wild-derived PWK/PhJ strain.

146 We next sought to assess individual differences in initial locomotor response to cocaine, a  
147 behavioral phenotype that predicts subsequent drug use in humans (de Wit and Phillips, 2012).  
148 In these diverse mouse strains, initial cocaine sensitivity showed strong heritability ( $H^2 = 0.48$   
149 for initial sensitivity, **Figure 1G**). Wild-derived strains, particularly WSB/EiJ and PWK/PhJ,  
150 exhibited the highest initial sensitivity to cocaine.

151 Operant drug self-administration procedures directly quantify reinforced responding for drug  
152 (Dickson et al., 2015) and produce profound transcriptional responses in inbred strain (Walker  
153 et al., 2018). Heritability of cocaine IVSA traits in the founders of the DO was strong ( $H^2 = 0.47$   
154 for sessions to acquisition of IVSA, **Figure 1H**) to very strong ( $H^2 = 0.60$  for total infusions at FR-1  
155 1.0 mg/kg, **Figure 1I**). The high heritability of infusions earned is similar in magnitude to the  
156 observed heritability of human cocaine use disorder (Goldman et al., 2005). Of note,  
157 129S1/SvlmJ mice do not acquire IVSA and do not take any cocaine during the acquisition



158 phase. The largest phenotypic range manifests in wild-derived mice; PWK/PhJ mice acquired  
 159 IVSA behavior very quickly and self-administered the most infusions of cocaine at FR-1 1.0  
 160 mg/kg – about four times as much as C57BL/6J – while WSB/EiJ mice self-administered the  
 161 fewest infusions of cocaine relative to  
 162 the other strains that do acquire IVSA  
 163 behavior. The broad phenotypic range  
 164 of volitional cocaine-taking behaviors in  
 165 these genetically diverse mouse strains  
 166 represents a clear opportunity to study  
 167 mechanisms underlying variation in the  
 168 initiation of cocaine of addiction.  
 169 Because addiction-related phenotypes  
 170 are highly heritable and sometimes  
 171 exhibit sex differences moderated by  
 172 genetics, we next sought to assess  
 173 heritable differences in the molecular  
 174 response to cocaine. Male and female  
 175 mice of the eight DO founder strains  
 176 were given multiple injections of  
 177 cocaine or saline over 19 days. Samples  
 178 for bulk RNAseq were collected from  
 179 striatum 24-48 hours after the final  
 180 injection of repeated administration of  
 181 either cocaine or vehicle (sham). First,  
 182 we documented that in the absence of  
 183 cocaine, most transcripts exhibited  
 184 expression that was moderate to  
 185 strong at baseline in the founder  
 186 strains (median  $H^2 = 0.29$ ) and that

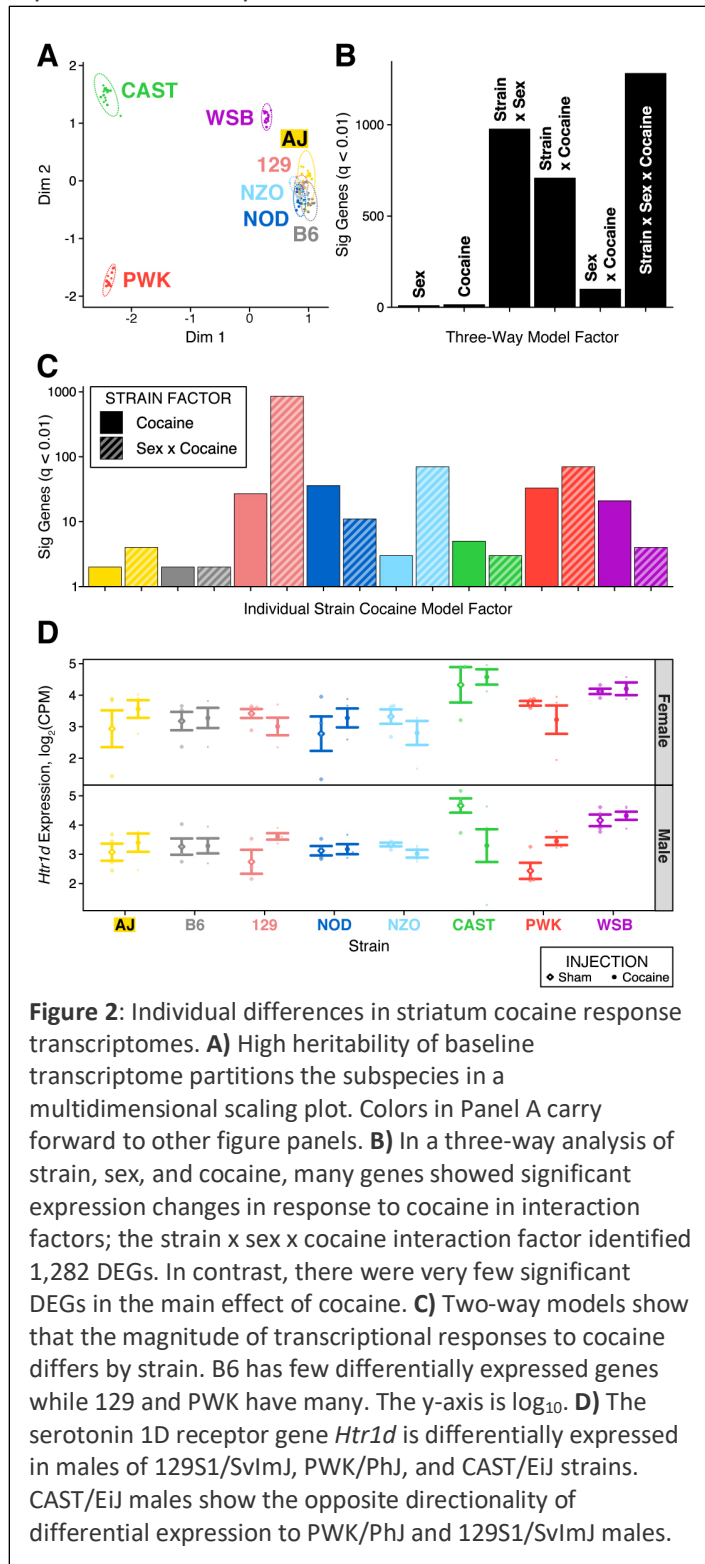

187 subspecies of origin explains the greatest amount of variance in expression (**Figure 2A**). Using a  
188 linear modeling approach (Chen et al., 2014; Phipson et al., 2016), we found few expression  
189 differences attributable solely to the effect of cocaine treatment. Instead, significant effects of  
190 cocaine arose in interaction with individual differences such as genetic background, sex, and  
191 their interaction. The greatest quantity of differentially expressed transcripts was observed in  
192 the strain-by-sex-by-drug treatment three-way interaction (1,282 genes at  $q < 0.01$ , **Figure 2B**,  
193 **Supplementary Table S2**). Some strains showed stronger cocaine effects as measured by  
194 number of differentially expressed genes than others; 129S1/SvImJ and PWK/PhJ had many  
195 genes whose expression is influenced by cocaine and sex-by-cocaine interactions (PWK/PhJ: 89  
196 genes at  $q < 0.01$ , **Figure 2C**) while the commonly used C57BL/6J strain had very few genes  
197 influenced by cocaine (four genes at  $q < 0.01$ , **Figure 2C**). Because statistical power was  
198 approximately equal for all strains involved in this study, these differences likely reflect real  
199 individual differences in the brain's sex-specific responses to cocaine.

200 This genetics- and sex-inclusive approach identified many more changes in gene expression  
201 following repeated cocaine exposure than had we used only a single sex in a single inbred  
202 strain. For instance, we identified differential expression of the serotonin receptor 1D gene  
203 *Htr1d* in the strain-by-sex-by-cocaine interaction factor. This gene, while not altered in  
204 C57BL/6J animals, is upregulated in males of 129S1/SvImJ and PWK/PhJ strains, but  
205 downregulated in males of the CAST/EiJ strain (**Figure 2D**).

206 Some of the heritable transcriptome differences we observed corroborate previous work  
207 showing heritable differences in pharmacokinetics of cocaine (Wiltshire et al., 2015) – for  
208 example, PWD/PhJ mice – closely related to the high cocaine taking PWK/PhJ strain – are  
209 known to have some of the highest brain concentrations of cocaine shortly after injection.  
210 These pharmacokinetic differences do not account for the strong differences between strains  
211 such as 129S1/SvImJ and A/J, whose brain cocaine pharmacokinetic profiles are very similar  
212 (Wiltshire et al., 2015). Further research on highly diverse mice may resolve the mechanisms  
213 driving individual differences between strains with closely matched pharmacokinetic profiles.

214 We assessed to what degree strain and sex combinations mimic human genomic findings to  
215 understand how individual differences' influence on consilience with human research. We used

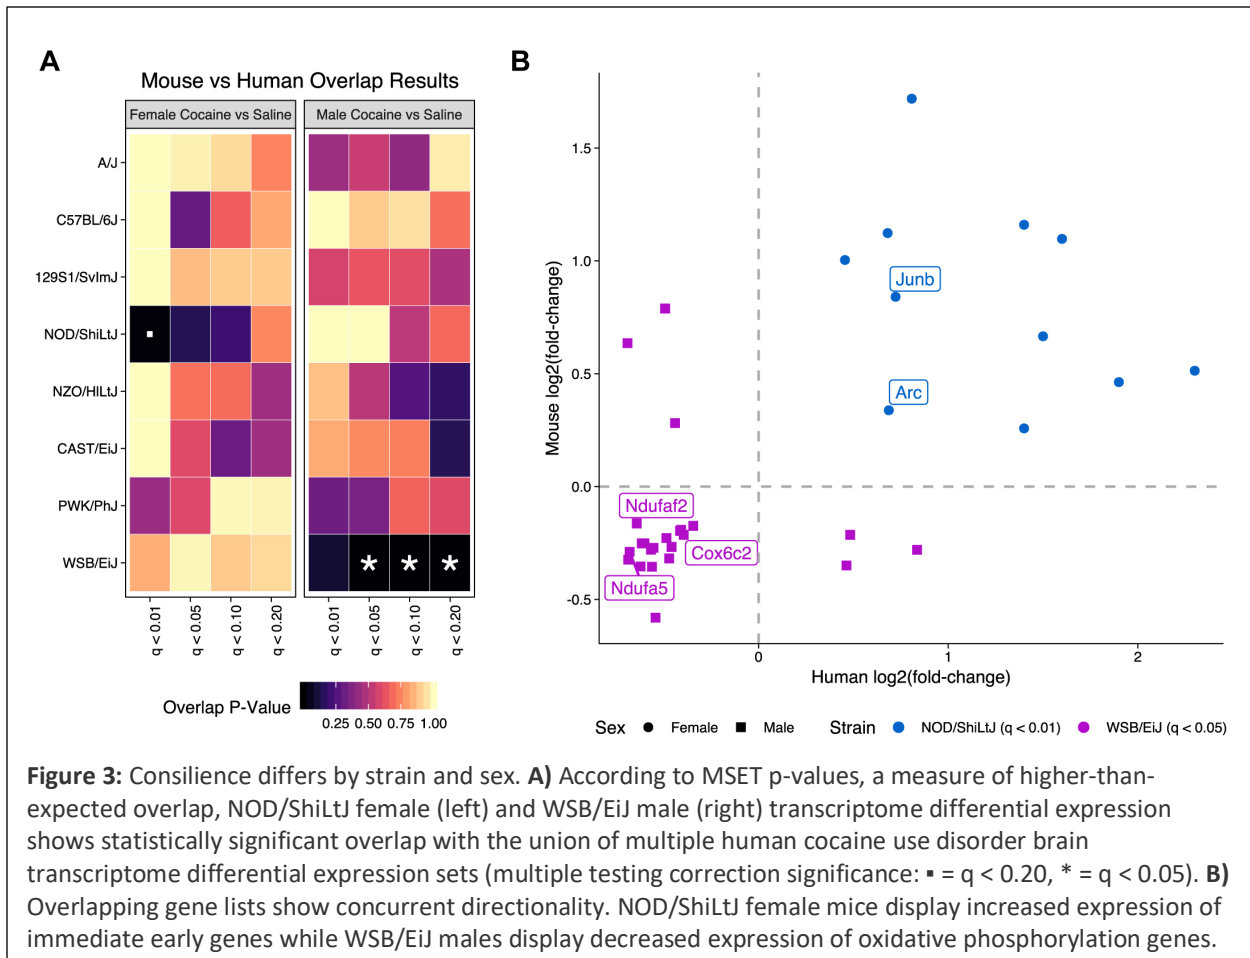

**Figure 3:** Consilience differs by strain and sex. **A)** According to MSET p-values, a measure of higher-than-expected overlap, NOD/ShiLtJ female (left) and WSB/EiJ male (right) transcriptome differential expression shows statistically significant overlap with the union of multiple human cocaine use disorder brain transcriptome differential expression sets (multiple testing correction significance: ■ = q < 0.20, \* = q < 0.05). **B)** Overlapping gene lists show concurrent directionality. NOD/ShiLtJ female mice display increased expression of immediate early genes while WSB/EiJ males display decreased expression of oxidative phosphorylation genes.

216 the MSET method (Eisinger et al., 2013) to identify statistically significant overlaps of  
 217 orthologous genes between a human cocaine use disorder brain transcriptome dataset and  
 218 analogously analyzed cocaine response transcriptomes within each individual strain and sex  
 219 combination (Huggett et al., 2020). The magnitude of overlap was highly variable; the strongest  
 220 overlaps were in NOD/ShiLtJ female and WSB/EiJ male mice, though the NOD/ShiLtJ female  
 221 finding is not robust to different significance thresholds and does not survive stringent multiple  
 222 testing correction (**Figure 3A, Supplementary Table S3**). Other strains, including the most widely  
 223 used C57BL/6J, do not strongly mimic cocaine use disorder brain transcriptomes, a finding  
 224 consistent with previous observations of C57BL/6J males (Huggett et al., 2020). When we  
 225 examined the directionality of differential expression overlaps in NOD/ShiLtJ females and in  
 226 WSB/EiJ males, we found concordance in the upregulated and downregulated genes between  
 227 human and mouse data; in this experiment, WSB/EiJ males mostly captured downregulated  
 228 aspects of expression while NOD/ShiLtJ females mostly captured upregulated aspects (**Figure**

229 **3B**). Genes within the NOD/ShiLtJ female set include directional matches in immediate early  
230 genes such as *Arc*, and *Junb* while genes downregulated in WSB/EiJ males include multiple  
231 oxidative phosphorylation-related genes such as *Ndufa5*, *Cox6c2*, and *Ndufaf2*. The presence of  
232 two mitochondrial Complex I subunit genes is particularly interesting; cocaine treatment  
233 disrupts Complex I in the rat brain (Cunha-Oliveira et al., 2013) and a Complex I subunit gene is  
234 associated with cocaine use disorder in humans (Huggett and Stallings, 2020a).

235 To describe the molecular systems dysregulated after repeated cocaine exposure in these  
236 strains, we performed separate Gene Ontology Biological Process (GO BP) analysis of the genes  
237 shared between human cocaine use disorder and WSB/EiJ male or the NOD/ShiLtJ female  
238 differentially expressed gene sets. WSB/EiJ male differentially expressed genes were enriched  
239 mostly for RNA binding and mRNA processing while NOD/ShiLtJ female differentially expressed  
240 genes were enriched for nucleobase-related metabolic processes (**Supplementary Table S5**).

241 Together, these results imply that similarities mostly capture alterations in transcriptional  
242 regulatory components.

243 Because the transcriptome results derive from the same group of mice as cocaine locomotor  
244 sensitivity, it is of particular note that WSB/EiJ mice show the strongest behavioral response in  
245 cocaine-induced locomotor sensitivity of all the strains tested (**Figure 1G**). Variants that alter  
246 initial sensitivity to drugs are among the best supported and described addiction candidates in  
247 humans, for example, nicotinic acetylcholine receptor polymorphisms associated with smoking  
248 alter the receptor's sensitivity to nicotinic agonists (Bierut et al., 2008). This result implies that  
249 WSB/EiJ male mice experience human-relevant alterations in their neurobiological states due to  
250 differential cocaine sensitivity after repeated cocaine injection. However, WSB/EiJ mice take  
251 fewer infusions of cocaine at FR-1 1.0 mg/kg than any other strain that reliably acquires IVSA  
252 (**Figure 1H**). Though the finding of higher consilience associated with lower cocaine-taking  
253 behavior appears to contradict the conventional interpretation of cocaine self-administration,  
254 where higher cocaine intake indicates higher addiction vulnerability (Piazza et al., 2000), we  
255 note that experimenter-administered cocaine affects neural signaling differently than self-  
256 administered cocaine (McCutcheon et al., 2011). Consequently, this finding should demonstrate  
257 that individual differences are highly important to consider for translational research using non-

258 human animals, but should not be taken as a specific recommendation of WSB/EiJ males as a  
259 model for human cocaine use disorder phenotypes.

260 The translational relevance of non-human animals – often represented by mice – is the subject  
261 of substantial discussion (Seok et al., 2013; Takao and Miyakawa, 2015). Within addiction  
262 biology, a particularly active source of ferment is the question of how rodents may best  
263 recapitulate aspects of addictive behaviors such as compulsive use and reinstatement (Ahmed,  
264 2012). Here, we further this discussion by demonstrating that similarity of rodent molecular  
265 systems to those involved in human neuropsychiatric-traits are heterogeneous and contingent  
266 upon the specific rodents chosen. Within conventional inbred mouse strains, NOD/ShiLtJ  
267 females and WSB/EiJ males showed the highest consilience with human cocaine phenotypes in  
268 the brain as measured by similarity in genomic response. This finding has broad implications for  
269 translational work. In many cases, the study of a single strain and/or only one sex of mice  
270 within an experiment may limit the generalizability of the data and diminish potential relevance  
271 for human addiction. Rather, it may be advantageous to explicitly take individual differences of  
272 the type reported here into account. Strategies for querying diversity include identification of  
273 specific strains that exhibit characteristics of the disease-susceptible population at a behavioral  
274 or molecular level or surveys of a diverse population to ensure that natural variation is  
275 represented, which allows queries of known biological sources of variation in addiction  
276 vulnerability.

277 An important aspect of experimental rigor is the external validity of model organism research  
278 paradigms. Here we show that this validity is in part driven by the organism under investigation  
279 in addition to other characteristics of the research paradigm. Genetic variation is a valuable  
280 resource for the discovery of biological mechanisms of addiction (Kumar et al., 2013; Ruan et  
281 al., 2020). Similar to humans, individual differences among mice greatly influence behavioral,  
282 physiological, and transcriptomic cocaine-related traits. For many of these traits, individual  
283 differences explain a substantial proportion of the variation. This variation can be exploited to  
284 enhance consilience of biological systems under study, or to discover the underlying biological  
285 mechanisms of vulnerability to disease. Individual variation in addiction-related traits is a  
286 largely untapped resource that can be exploited to improve and accelerate discovery of

287 neurobiological and genetic mechanisms related to risk for addiction as well as other complex  
288 diseases.

## 289 **Methods**

### 290 **Standard Operating Procedures**

291 All methodologies used in this work are documented in depth in the Center for Systems

292 Neurogenetics of Addiction's Standard Operating Procedures (SOPs)

293 ([https://www.jax.org/research-and-faculty/research-centers/systems-neurogenetics/data-](https://www.jax.org/research-and-faculty/research-centers/systems-neurogenetics/data-resources)

294 [resources](https://www.jax.org/research-and-faculty/research-centers/systems-neurogenetics/data-resources)). The brief methods appearing below summarize these SOPs and reference specific

295 SOPs.

### 296 **Animals**

297 Mice from the following strains were surveyed in these experiments: A/J (JAX stock #000646),

298 C57BL/6J (JAX stock #000664), 129S1/SvImJ (JAX stock #002448), NOD/ShiLtJ (JAX stock

299 #001976), NZO/HILtJ (JAX stock #002105), CAST/EiJ (JAX stock #000928), PWK/PhJ (JAX stock

300 #003715), and WSB/EiJ (JAX stock #001145). These strains are the founders of the DO

301 heterogeneous stock and CC recombinant inbred strains. Surveys of these eight strains can

302 demonstrate statistical heritability patterns that justify further dissection using the derived

303 resources (Saul et al., 2019b). The mice used in the Research Animal Facility at The Jackson

304 Laboratory came from breeding colonies maintained in the Research Animal Facility. These

305 colonies were derived from production colonies at The Jackson Laboratory and breeders were

306 replaced with animals from The Jackson Laboratory's production colony at least every five

307 generations. The mice used in the Jentsch Lab at Binghamton University were shipped to the

308 Jentsch Lab from either the Research Animal Facility colonies or from production colonies in

309 The Jackson Laboratory. The studies described utilized a total of 1,085 mice (**Supplementary**

310 **Table S4**). All procedures were approved by the Jackson Laboratory of Mammalian Genetics or

311 Binghamton University institutional animal care and use committees.

312 Mouse Husbandry and Housing

313 Mice were housed according to the CSNA animal housing SOP ([https://www.jax.org/-](https://www.jax.org/-/media/jaxweb/files/research-and-faculty/tools-and-resources/system-neurogenetics/csna-animal-housing.pdf)  
314 [/media/jaxweb/files/research-and-faculty/tools-and-resources/system-neurogenetics/csna-](https://www.jax.org/-/media/jaxweb/files/research-and-faculty/tools-and-resources/system-neurogenetics/csna-animal-housing.pdf)  
315 [animal-housing.pdf](https://www.jax.org/-/media/jaxweb/files/research-and-faculty/tools-and-resources/system-neurogenetics/csna-animal-housing.pdf)).

316 Cocaine

317 Cocaine hydrochloride was provided by the National Institute on Drug Abuse Drug Supply  
318 Program Division of Therapeutics and Medical Consequences (catalog number: 9041-001).  
319 Cocaine was stored in powder form at room temperature until it was formulated into 0.9%  
320 Saline (100 mg/mL clear solution) in various concentrations specific to each experiment  
321 according to their individual SOPs.

322 Novelty Response Behavioral Phenotypes

323 Open field, light-dark box, hole board, and novel place preference behavioral paradigms were  
324 conducted in this order on consecutive days over the course of a week during the light phase of  
325 the light:dark cycle. Open field data were collected for 60 minutes according to the SOP  
326 ([https://www.jax.org/-/media/jaxweb/files/research-and-faculty/tools-and-resources/system-](https://www.jax.org/-/media/jaxweb/files/research-and-faculty/tools-and-resources/system-neurogenetics/open-field-assay.pdf?la=en&hash=32DDAFF2B17B2D4961C136C5616C4982AC23EC3B)  
327 [neurogenetics/open-field-](https://www.jax.org/-/media/jaxweb/files/research-and-faculty/tools-and-resources/system-neurogenetics/open-field-assay.pdf?la=en&hash=32DDAFF2B17B2D4961C136C5616C4982AC23EC3B)  
328 [assay.pdf?la=en&hash=32DDAFF2B17B2D4961C136C5616C4982AC23EC3B](https://www.jax.org/-/media/jaxweb/files/research-and-faculty/tools-and-resources/system-neurogenetics/open-field-assay.pdf?la=en&hash=32DDAFF2B17B2D4961C136C5616C4982AC23EC3B)). Light-dark data  
329 were collected for 20 minutes with the mouse starting in the light side of the chamber facing  
330 the dark side according to the SOP ([https://www.jax.org/-/media/jaxweb/files/research-and-](https://www.jax.org/-/media/jaxweb/files/research-and-faculty/tools-and-resources/system-neurogenetics/light-dark-assay.pdf?la=en&hash=A63CF8D22EB7936CF6C69A3178373981F4016675)  
331 [faculty/tools-and-resources/system-neurogenetics/light-dark-](https://www.jax.org/-/media/jaxweb/files/research-and-faculty/tools-and-resources/system-neurogenetics/light-dark-assay.pdf?la=en&hash=A63CF8D22EB7936CF6C69A3178373981F4016675)  
332 [assay.pdf?la=en&hash=A63CF8D22EB7936CF6C69A3178373981F4016675](https://www.jax.org/-/media/jaxweb/files/research-and-faculty/tools-and-resources/system-neurogenetics/light-dark-assay.pdf?la=en&hash=A63CF8D22EB7936CF6C69A3178373981F4016675)). Hole board data  
333 were collected for 20 minutes according to the SOP ([https://www.jax.org/-](https://www.jax.org/-/media/jaxweb/files/research-and-faculty/tools-and-resources/system-neurogenetics/hole-board-assay.pdf?la=en&hash=EC343A797D37209CF64D34E6031608A511D8E15D)  
334 [/media/jaxweb/files/research-and-faculty/tools-and-resources/system-neurogenetics/hole-](https://www.jax.org/-/media/jaxweb/files/research-and-faculty/tools-and-resources/system-neurogenetics/hole-board-assay.pdf?la=en&hash=EC343A797D37209CF64D34E6031608A511D8E15D)  
335 [board-assay.pdf?la=en&hash=EC343A797D37209CF64D34E6031608A511D8E15D](https://www.jax.org/-/media/jaxweb/files/research-and-faculty/tools-and-resources/system-neurogenetics/hole-board-assay.pdf?la=en&hash=EC343A797D37209CF64D34E6031608A511D8E15D)). Novel place  
336 preference included a five minute acclimation period to a center chamber, a 10 minute  
337 exposure period to a randomized exposure side, a five minute acclimation period, and a final  
338 test period consisting of a five minute habituation period again to the center and a 20 minutes  
339 preference assessment for which both the novel side and the initial familiar exposed side were

340 accessible according to the SOP ([https://www.jax.org/-/media/jaxweb/files/research-and-](https://www.jax.org/-/media/jaxweb/files/research-and-faculty/tools-and-resources/system-neurogenetics/novelty-place-preference-assay.pdf?la=en&hash=B5D2D0FC9028B408E84729C0C8832C580AB8E039)  
341 [faculty/tools-and-resources/system-neurogenetics/novelty-place-preference-](https://www.jax.org/-/media/jaxweb/files/research-and-faculty/tools-and-resources/system-neurogenetics/novelty-place-preference-assay.pdf?la=en&hash=B5D2D0FC9028B408E84729C0C8832C580AB8E039)  
342 [assay.pdf?la=en&hash=B5D2D0FC9028B408E84729C0C8832C580AB8E039](https://www.jax.org/-/media/jaxweb/files/research-and-faculty/tools-and-resources/system-neurogenetics/novelty-place-preference-assay.pdf?la=en&hash=B5D2D0FC9028B408E84729C0C8832C580AB8E039)). All mice from the  
343 Center for Systems Neurogenetics of Addiction were tested through this novelty pipeline prior  
344 to any other test and were then randomized and assigned into either reversal learning, cocaine  
345 locomotor sensitization, or cocaine intravenous self-administration. The novelty study  
346 produced observations from a total of 783 mice.

#### 347 *Bmal1-dLuc* Circadian Rhythm Data

348 Data for circadian rhythm were measured in primary fibroblast cultures generated from skin  
349 biopsies in the founders. To isolate fibroblasts, ear biopsies (one mm in diameter) were  
350 digested in Dulbecco's Modified Eagle's Medium (DMEM, HyClone) containing 2.5 mg/ml  
351 collagenase D (Gibco) and 1.25 mg/ml pronase (Millipore) for 90 mins and then plated in DMEM  
352 growth media containing 10% Fetal Bovine Serum (FBS, HyClone), 292 µg/ml L-glutamine  
353 (HyClone), 100 units/ml penicillin (Hyclone) and 100 µg/ml streptomycin (HyClone). *Bmal1-*  
354 *dLuc* reporter was delivered to fibroblasts by lentiviral-mediated gene delivery (VectorBuilder).  
355 Following synchronization of rhythms by 15 µM forskolin (Sigma) for two hours, the temporal  
356 patterns of *Bmal1-dLuc* bioluminescence was recorded for ~70 seconds at intervals of 10  
357 minutes over six to seven days from fibroblast cultures in DMEM recording media containing 15  
358 µM forskolin, 25 mM HEPES (Gibco), 292 µg/ml L-glutamine, 100 units/ml penicillin, 100 µg/ml  
359 streptomycin, and 10 µM luciferin (Promega) by an automated 32-channel luminometer  
360 (Lumicycle, ActiMetrics) in a standard tissue culture incubator at 32°C. The amplitude of  
361 bioluminescence rhythms was determined from baseline-subtracted data using the damped  
362 sine fit and Levenberg-Marquardt algorithm (Izumo et al., 2003). The circadian study produced  
363 observations from a total of 56 mice.

#### 364 Reversal Learning

365 Data for reversal learning were collected at both JAX and Binghamton University using the SOP  
366 ([https://www.jax.org/-/media/jaxweb/files/research-and-faculty/tools-and-resources/system-](https://www.jax.org/-/media/jaxweb/files/research-and-faculty/tools-and-resources/system-neurogenetics/reversal-learning-)  
367 [neurogenetics/reversal-learning-](https://www.jax.org/-/media/jaxweb/files/research-and-faculty/tools-and-resources/system-neurogenetics/reversal-learning-)



368 [assay.pdf?la=en&hash=8484E47B170462960E11C1FAEEE6FF3CE6FDFC08](#)). The reversal  
369 learning data produced observations from a total of 202 mice.

#### 370 Initial Locomotor Sensitivity to Cocaine

371 Data for initial locomotor sensitivity were collected as described previously (Schoenrock et al.,  
372 2020) using data from days 1-3 in the SOP for locomotor behavioral sensitization to cocaine  
373 ([https://www.jax.org/-/media/jaxweb/files/research-and-faculty/tools-and-resources/system-](https://www.jax.org/-/media/jaxweb/files/research-and-faculty/tools-and-resources/system-neurogenetics/cocaine-locomotor-sensitization-assay.pdf?la=en&hash=9E5D4C248C3BCCAD947C164AE81663C13A77EB0D)  
374 [neurogenetics/cocaine-locomotor-sensitization-](#)  
375 [assay.pdf?la=en&hash=9E5D4C248C3BCCAD947C164AE81663C13A77EB0D](#)). Briefly, mice were  
376 placed into the open field arena for 30 minutes, removed, and injected i.p. with either saline  
377 (days 1-2) or 10 mg/kg cocaine (day 3) and returned to the open field arena for 60 minutes.  
378 Distance moved after injection on day 3 minus day 2 was used as a measure of initial locomotor  
379 sensitivity to cocaine. The sensitization study produced observations from a total of 230 mice.

#### 380 Cocaine Intravenous Self-Administration

381 Prior to cocaine intravenous self-administration, mice were implanted with a jugular catheter  
382 and allowed a minimum of 10 days for post-operative recovery. In an operant conditioning  
383 paradigm, mice were allowed to acquire cocaine self-administration at 1.0 mg/kg, then  
384 evaluated for dose-response effects at eight different doses. After a stabilizing dose at 1.8  
385 mg/kg, extinction-related responses during seven days of withdrawal were recorded. Finally,  
386 cued reinstatement was recorded for two days. Self-administration in these eight mouse strains  
387 was performed according to v1.0 of the CSNA's SOP ([https://www.jax.org/-](https://www.jax.org/-/media/jaxweb/files/research-and-faculty/tools-and-resources/system-neurogenetics/intravenous-self-administration-ivsa-paradigm.pdf?la=en&hash=FA64135F219C7DF65937A1CF9270301B0E771836)  
388 [/media/jaxweb/files/research-and-faculty/tools-and-resources/system-](#)  
389 [neurogenetics/intravenous-self-administration-ivsa-](#)  
390 [paradigm.pdf?la=en&hash=FA64135F219C7DF65937A1CF9270301B0E771836](#)). The  
391 intravenous self-administration study produced observations from a total of 217 mice.

#### 392 Data Deposit

393 Data for each phenotype will be deposited in the Mouse Phenome Database (MPD) (Bogue et  
394 al., 2019) upon publication.

## 395 Heritability Calculations

396 For each trait, heritability was calculated from linear models using the isogenic strain as the  
397 independent categorical variable using the following equation:

$$398 \quad h^2 = \frac{MS_{strain}}{MS_{strain} + (n_{mean} - 1) * MS_{resid}}$$

399 where  $MS_{strain}$  is the mean square of the strain effect,  $n_{mean}$  is the mean number of samples  
400 within each strain, and  $MS_{resid}$  is the mean square of the residuals. For the reversal learning  
401 data, an additional additive covariate of site was included in the model to account for inter-lab  
402 variation. This term was not utilized in the heritability calculation.

403 For some traits such as number of infusions at FR-1 1.0 mg/kg cocaine self-administration, a  
404 single strain such as 129S1/SvImJ showed little to no variation, which may upwardly bias  
405 heritability calculations. For these traits, heritability was calculated both with and without the  
406 low variance strain. The data reported in the paper rely upon the inclusive calculation, but  
407 results of both methods of calculation are reported for completeness (see **Supplementary**  
408 **Table S1**).

## 409 RNAseq

410 Striatum tissue was collected during the light stage of the light:dark cycle between 24 and 48  
411 hours after the final injection in the cocaine behavioral sensitization protocol according to the  
412 SOP ([https://www.jax.org/-/media/jaxweb/files/research-and-faculty/tools-and-  
413 resources/system-neurogenetics/post-sensitization-tissue-  
414 collection.pdf?la=en&hash=9E6CD8DEB39606B791A5D25F6CD0611EF14D96A7](https://www.jax.org/-/media/jaxweb/files/research-and-faculty/tools-and-resources/system-neurogenetics/post-sensitization-tissue-collection.pdf?la=en&hash=9E6CD8DEB39606B791A5D25F6CD0611EF14D96A7)). Tissue was  
415 collected for both sexes of each founder strain exposed to either sham (saline) or 10 mg/kg IP  
416 cocaine.

417 RNA was isolated from striatum tissue using the MagMAX mirVana Total RNA Isolation Kit  
418 (ThermoFisher) and the KingFisher Flex purification system (ThermoFisher). Tissues were lysed  
419 and homogenized in TRIzol Reagent (ThermoFisher). After the addition of chloroform, the RNA-  
420 containing aqueous layer was removed for RNA isolation according to the manufacturer's  
421 protocol, beginning with the RNA bead binding step.

422 RNA concentration and quality were assessed using the Nanodrop 2000 spectrophotometer  
423 (Thermo Scientific) and the RNA Total RNA Nano assay (Agilent Technologies). 2µl of diluted  
424 1:1000 diluted ERCC Spike-in Control Mix 1 (Ambion by Life Technologies) was added to 100ng  
425 of each RNA sample prior to library construction. Libraries were prepared by the Genome  
426 Technologies core service at The Jackson Laboratory using the KAPA RNA Hyper Prep Kit with  
427 RiboErase (HMR) (KAPA Biosystems), according to the manufacturer's instructions. Briefly, the  
428 protocol entails depletion of ribosomal RNA (rRNA), RNA fragmentation, first and second strand  
429 cDNA synthesis, ligation of Illumina-specific adapters containing a unique barcode sequence for  
430 each library, magnetic bead size selection, and PCR amplification. Libraries were checked for  
431 quality and concentration using the D5000 ScreenTape assay (Agilent Technologies) and  
432 quantitative PCR (KAPA Biosystems), according to the manufacturers' instructions.

433 RNAseq libraries were pooled and sequenced by Novogene in 150 bp paired-end format on an  
434 Illumina NovaSeq 6000 sequencer targeting 90 million read pairs per sample. Sequencing  
435 achieved a median read depth of 132 million reads. The resultant reads were determined to be  
436 of consistently high quality using fastqc v0.11.3 and MultiQC v1.2.

437 Reads were generated from raw data and demultiplexed using BCL2Fastq v2.18.0.12,  
438 concatenated by sample, and aligned with the STAR aligner v2.6.1 (Dobin et al., 2013) to the  
439 GRCm38 mouse reference genome with v94 of the Ensembl transcriptome. Transcript-level  
440 quantification was estimated using RSEM v1.3.0 (Li and Dewey, 2011) on a transcriptome BAM  
441 file produced as an output of this alignment. The data were imported into R v3.5.1 and  
442 summarized to the gene level using tximport v1.10.1 (Soneson et al., 2016), TMM-normalized  
443 using edgeR v3.24.3 (Chen et al., 2014), and imported into limma v3.38.3 (Ritchie et al., 2015)  
444 using the log<sub>2</sub>-transformation function voom. We compared multivariate approaches modeling  
445 with interaction factors between edgeR and voom+limma approaches and found that  
446 voom+limma performs better than edgeR for controlling false negatives. Upon initial  
447 examination of the findings, we identified intermittent contamination with choroid plexus,  
448 which potentially derives from the ventricular aspect of the dorsal striatum. Correcting for this  
449 contamination necessitated an additive covariate for choroid plexus consisting of log-mean CPM  
450 values of *Kl* and *Ttr* expression, unambiguous markers for choroid plexus (Sathyanesan et al.,

451 2012). These values were  $\log_2$  transformed for work in limma. For An overall model for all  
452 strains included this choroid plexus factor as a nuisance variable plus the main effects of strain,  
453 sex, and cocaine injection and all of their interactions. Individual models included the choroid  
454 plexus nuisance variable plus sex, cocaine injection, and sex:cocaine injection interaction.  
455 Correction for local false discovery rates utilized the qvalue package in R v2.14.1 (Storey and  
456 Tibshirani, 2003). Because brain transcriptional changes are subtle (Hitzemann et al., 2014), all  
457 results reported are at  $q < 0.01$  with no fold-change cutoff (**Supplementary Table S2**).

458 Raw data and transcript-level expression estimates will be deposited in the Gene Expression  
459 Omnibus (Barrett et al., 2012) upon publication (accession number: GSEXXXXX).

#### 460 **Cross-Species Gene List Comparison**

461 To assess the molecular correspondence of mouse cocaine self-administration with human  
462 cocaine use, we compared the results of the current study to differentially expressed genes  
463 (BH-FDR  $< 0.05$ ) associated with cocaine use disorder (CUD) in the midbrain ( $n = 20$ , 50% CUD,  
464  $M_{AGE} = 49.2$ , s.d. = 3.9; (Bannon et al., 2014), microarray), hippocampus ( $n = 15$ , 46.7% CUD,  
465  $M_{AGE} = 39.4$ , s.d.<sub>AGE</sub> = 39.4; [Huggett and Stallings, 2020a, 2020b](#), RNA-sequencing) and dIPFC  
466 neurons ( $n = 36$ , 52.7% CUD,  $M_{AGE} = 35.0$ , s.d.<sub>AGE</sub> = 11.0; (Huggett and Stallings, 2020a); neuron-  
467 specific RNA-sequencing). The aforementioned studies utilized methods that maximized power  
468 for identifying differentially expressed genes and used case/control analyses that compared  
469 individuals with CUD to matched cocaine free controls. A list of all the differentially expressed  
470 genes can be found on GeneWeaver (<https://www.geneweaver.org/>; GS398242).

471 A key of 1:1 orthologs between humans and mice was generated from the MGI Vertebrate  
472 Homology indices (accessed 2020-05-18). This key was used to compare the human gene set to  
473 contrast tables within strain and sex combinations. To perform these comparisons, we used the  
474 MSET algorithm (Eisinger et al., 2013) as contained in v1.16.6 of the msaul/msaul R package  
475 (<https://github.com/msaul/msaul>). MSET p-values were corrected for multiple comparisons  
476 using the qvalue package in R v2.14.1 (Storey and Tibshirani, 2003). Gene Ontology Biological  
477 Process (GO BP) analysis on overlapping genes was performed on mouse Ensembl identifiers  
478 using the AmiGO v2 web tool (accessed 2020-05-28) on GO Ontology Database

479 doi:10.5281/zenodo.3727280 with Fisher's exact tests and Bonferroni correction settings  
480 (Carbon et al., 2009).

## 481 [Supplemental Material](#)

482 **Supplementary Table S1:** Statistical test results for heritability and genotype-by-sex  
483 interactions.

484 **Supplementary Table S2:** Differential expression results for all tests discussed.

485 **Supplementary Table S3:** Quantification of overlap significance between human cocaine use  
486 disorder transcriptome and individual strain and sex cocaine transcriptomes.

487 **Supplementary Table S4:** Sample sizes for all strain and sex combinations for studies reported.

488 **Supplementary Table S5:** Gene Ontology Biological Process results for WSB/EiJ male and  
489 NOD/ShiLtJ female overlapping gene sets.

490 Raw behavioral data will be deposited in the Mouse Phenome Database upon publication.

491 Gene expression data will be deposited in the Gene Expression Omnibus upon publication.

492 All scripts, code, and metadata used for analysis are deposited in GitHub (repository:  
493 [github.com/msaul/csna\\_founders\\_survey\\_2020](https://github.com/msaul/csna_founders_survey_2020))

## 494 [Author Contributions](#)

495 EJC, PED, LMT, SAS, JDJ, RWL, CAM, LGR, VMP, and SJSR conceived the studies. SJSR, PED, JRB,  
496 LSB, SAS, RD, ML, AO, TR, TW, and LHG designed and implemented the behavioral experiments.  
497 SMK designed and implemented the circadian transcriptional experiment. JRB, LSB, UD, PED,  
498 ML, SMK, AO, TR, SAS, TW, LHG, VMP, and MCS analyzed the behavioral data. SMK, MCS, and  
499 VMP analyzed the circadian transcriptional data. MCS, VMK, and VMP analyzed the RNAseq  
500 data. MCS, UD, PED, SBH, JRB, LSB, SAS, TW, LHG, VMP, and EJC interpreted the behavioral  
501 results. SMK, MCS, and VMP interpreted the results of the circadian transcriptional experiment.  
502 MCS, VMK, VMP, and EJC interpreted the RNAseq results. MCS, SBH, RHCP, and EJC conceived,  
503 designed, analyzed, and interpreted the comparison between mouse and human gene sets.  
504 MCS and EJC wrote the manuscript.

## 505 Acknowledgements

506 We gratefully acknowledge Genome Technologies service at The Jackson Laboratory for their  
507 expert assistance on the RNAseq experiment, Surgical Services at The Jackson Laboratory for  
508 their work on the intravenous self-administration paradigm, and the NIDA Drug Supply for  
509 providing cocaine. We would further like to thank Stephen Krasinski for critical reading and  
510 comments during manuscript preparation, Robert W. Williams for helpful discussion on the  
511 analysis, and C. Herbert Pratt for scientific program management. This work was funded by NIH  
512 P50 DA039841 (Center for Systems Neurogenetics of Addiction) to EJC, LMT, JDJ, RWL CAM,  
513 VMP, LGR, and SJSR as well as NIH R01 DA037927 to EJC, DP1 DA042103 to RHCP, and K99  
514 DA043573 to PED.

## 515 Literature Cited

- 516 Ahmed SH. 2012. The science of making drug-addicted animals. *Neuroscience* **211**:107–125.  
517 doi:10.1016/j.neuroscience.2011.08.014
- 518 Bannon MJ, Johnson MM, Michelhaugh SK, Hartley ZJ, Halter SD, David JA, Kapatos G, Schmidt  
519 CJ. 2014. A Molecular Profile of Cocaine Abuse Includes the Differential Expression of  
520 Genes that Regulate Transcription, Chromatin, and Dopamine Cell Phenotype.  
521 *Neuropsychopharmacology* **39**:2191–2199. doi:10.1038/npp.2014.70
- 522 Barrett T, Wilhite SE, Ledoux P, Evangelista C, Kim IF, Tomashevsky M, Marshall KA, Phillippy  
523 KH, Sherman PM, Holko M, Yefanov A, Lee H, Zhang N, Robertson CL, Serova N, Davis S,  
524 Soboleva A. 2012. NCBI GEO: archive for functional genomics data sets—update. *Nucleic  
525 Acids Res* **41**:D991–D995. doi:10.1093/nar/gks1193
- 526 Beck JA, Lloyd S, Hafezparast M, Lennon-Pierce M, Eppig JT, Festing MF, Fisher EM. 2000.  
527 Genealogies of mouse inbred strains. *Nat Genet* **24**:23–25. doi:10.1038/71641
- 528 Becker JB, Chartoff E. 2019. Sex differences in neural mechanisms mediating reward and  
529 addiction. *Neuropsychopharmacology* **44**:166–183. doi:10.1038/s41386-018-0125-6
- 530 Becker JB, Perry AN, Westenbroek C. 2012. Sex differences in the neural mechanisms mediating  
531 addiction: a new synthesis and hypothesis. *Biol Sex Differ* **3**:14. doi:10.1186/2042-6410-  
532 3-14
- 533 Bierut LJ, Stitzel JA, Wang JC, Hinrichs AL, Grucza RA, Xuei X, Saccone NL, Saccone SF, Bertelsen  
534 S, Fox L, Horton WJ, Breslau N, Budde J, Cloninger CR, Dick DM, Foroud T, Hatsukami D,  
535 Hesselbrock V, Johnson EO, Kramer J, Kuperman S, Madden PAF, Mayo K, Nurnberger J,  
536 Pomerleau O, Porjesz B, Reyes O, Schuckit M, Swan G, Tischfield JA, Edenberg HJ, Rice  
537 JP, Goate AM. 2008. Variants in Nicotinic Receptors and Risk for Nicotine Dependence.  
538 *Am J Psychiatry* **165**:1163–1171. doi:10.1176/appi.ajp.2008.07111711

- 539 Bogenpohl JW, Mignogna KM, Smith ML, Miles MF. 2017. Integrative Analysis of Genetic,  
540 Genomic, and Phenotypic Data for Ethanol Behaviors: A Network-Based Pipeline for  
541 Identifying Mechanisms and Potential Drug Targets In: Schughart K, Williams RW,  
542 editors. *Systems Genetics, Methods in Molecular Biology*. New York, NY: Springer New  
543 York. pp. 531–549. doi:10.1007/978-1-4939-6427-7\_26
- 544 Bogue MA, Philip VM, Walton DO, Grubb SC, Dunn MH, Kolishovski G, Emerson J, Mukherjee G,  
545 Stearns T, He H, Sinha V, Kadakkuzha B, Kunde-Ramamoorthy G, Chesler EJ. 2019.  
546 Mouse Phenome Database: a data repository and analysis suite for curated primary  
547 mouse phenotype data. *Nucleic Acids Res* gkz1032. doi:10.1093/nar/gkz1032
- 548 Carbon S, Ireland A, Mungall CJ, Shu S, Marshall B, Lewis S, the AmiGO Hub, the Web Presence  
549 Working Group. 2009. AmiGO: online access to ontology and annotation data.  
550 *Bioinformatics* **25**:288–289. doi:10.1093/bioinformatics/btn615
- 551 Chen Y, Lun ATL, Smyth GK. 2014. Differential Expression Analysis of Complex RNA-seq  
552 Experiments Using edgeR In: Datta S, Nettleton D, editors. *Statistical Analysis of Next  
553 Generation Sequencing Data*. Cham: Springer International Publishing. pp. 51–74.  
554 doi:10.1007/978-3-319-07212-8\_3
- 555 Chesler EJ, Lu L, Shou S, Qu Y, Gu J, Wang J, Hsu HC, Mountz JD, Baldwin NE, Langston MA,  
556 Threadgill DW, Manly KF, Williams RW. 2005. Complex trait analysis of gene expression  
557 uncovers polygenic and pleiotropic networks that modulate nervous system function.  
558 *Nat Genet* **37**:233–242. doi:10.1038/ng1518
- 559 Crabbe JC, Wahlsten D, Dudek BC. 1999. Genetics of mouse behavior: interactions with  
560 laboratory environment. *Science* **284**:1670–1672.
- 561 Cunha-Oliveira T, Silva L, Silva AM, Moreno AJ, Oliveira CR, Santos MS. 2013. Mitochondrial  
562 complex I dysfunction induced by cocaine and cocaine plus morphine in brain and liver  
563 mitochondria. *Toxicol Lett* **219**:298–306. doi:10.1016/j.toxlet.2013.03.025
- 564 Dalley JW, Fryer TD, Brichard L, Robinson ES, Theobald DE, Lääne K, Peña Y, Murphy ER, Shah Y,  
565 Probst K, Abakumova I, Aigbirhio FI, Richards HK, Hong Y, Baron J-C, Everitt BJ, Robbins  
566 TW. 2007. Nucleus accumbens D2/3 receptors predict trait impulsivity and cocaine  
567 reinforcement. *Science* **315**:1267–1270.
- 568 Datta U, Schoenrock SE, Bubier JA, Bogue MA, Jentsch JD, Logan RW, Tarantino LM, Chesler EJ.  
569 2020. Prospects for finding the mechanisms of sex differences in addiction with human  
570 and model organism genetic analysis. *Genes Brain Behav* **19**. doi:10.1111/gbb.12645
- 571 de Wit H, Phillips TJ. 2012. Do initial responses to drugs predict future use or abuse? *Neurosci  
572 Biobehav Rev* **36**:1565–1576. doi:10.1016/j.neubiorev.2012.04.005
- 573 Dickson PE, Ndukum J, Wilcox T, Clark J, Roy B, Zhang L, Li Y, Lin D-T, Chesler EJ. 2015.  
574 Association of novelty-related behaviors and intravenous cocaine self-administration in  
575 Diversity Outbred mice. *Psychopharmacology (Berl)* **232**:1011–1024.

- 576 Dobin A, Davis CA, Schlesinger F, Drenkow J, Zaleski C, Jha S, Batut P, Chaisson M, Gingeras TR.  
577 2013. STAR: ultrafast universal RNA-seq aligner. *Bioinformatics* **29**:15–21.  
578 doi:10.1093/bioinformatics/bts635
- 579 Eisinger BE, Saul MC, Driessen TM, Gammie SC. 2013. Development of a versatile enrichment  
580 analysis tool reveals associations between the maternal brain and mental health  
581 disorders, including autism. *BMC Neurosci* **14**:147. doi:10.1186/1471-2202-14-147
- 582 Ersche KD, Turton AJ, Pradhan S, Bullmore ET, Robbins TW. 2010. Drug addiction  
583 endophenotypes: impulsive versus sensation-seeking personality traits. *Biol Psychiatry*  
584 **68**:770–773.
- 585 Fitzpatrick CJ, Gopalakrishnan S, Cogan ES, Yager LM, Meyer PJ, Lovic V, Saunders BT, Parker CC,  
586 Gonzales NM, Aryee E, Flagel SB, Palmer AA, Robinson TE, Morrow JD. 2013. Variation in  
587 the Form of Pavlovian Conditioned Approach Behavior among Outbred Male Sprague-  
588 Dawley Rats from Different Vendors and Colonies: Sign-Tracking vs. Goal-Tracking. *PLoS*  
589 *ONE* **8**:e75042. doi:10.1371/journal.pone.0075042
- 590 Goldman D, Oroszi G, Ducci F. 2005. The genetics of addictions: uncovering the genes. *Nat Rev*  
591 *Genet* **6**:521–532.
- 592 Hitzemann R, Darakjian P, Walter N, Dan Iancu O, Searles R, McWeeney S. 2014. Introduction to  
593 Sequencing the Brain Transcriptome. *International Review of Neurobiology*. Elsevier. pp.  
594 1–19. doi:10.1016/B978-0-12-801105-8.00001-1
- 595 Huggett SB, Bubier JA, Chesler EJ, Palmer RC. 2020. Meso-limbic Gene Expression Findings from  
596 Mouse Cocaine Self-Administration Recapitulate Human Cocaine Use Disorder  
597 (preprint). *Bioinformatics*. doi:10.1101/2020.01.31.929406
- 598 Huggett SB, Stallings MC. 2020a. Genetic Architecture and Molecular Neuropathology of Human  
599 Cocaine Addiction. *J Neurosci* JN-RM-2879-19. doi:10.1523/JNEUROSCI.2879-19.2020
- 600 Huggett SB, Stallings MC. 2020b. Cocaine'omics: Genome-wide and transcriptome-wide  
601 analyses provide biological insight into cocaine use and dependence. *Addict Biol*  
602 **25**:e12719. doi:10.1111/adb.12719
- 603 Hyman SE. 2018. The daunting polygenicity of mental illness: making a new map. *Philos Trans R*  
604 *Soc B Biol Sci* **373**:20170031. doi:10.1098/rstb.2017.0031
- 605 Hyman SE. 2012. Revolution Stalled. *Sci Transl Med* **4**:155cm11-155cm11.  
606 doi:10.1126/scitranslmed.3003142
- 607 Izquierdo A, Jentsch JD. 2012. Reversal learning as a measure of impulsive and compulsive  
608 behavior in addictions. *Psychopharmacology (Berl)* **219**:607–620.
- 609 Izumo M, Johnson CH, Yamazaki S. 2003. Circadian gene expression in mammalian fibroblasts  
610 revealed by real-time luminescence reporting: Temperature compensation and  
611 damping. *Proc Natl Acad Sci* **100**:16089–16094. doi:10.1073/pnas.2536313100



- 612 Kim S-M, Neuendorff N, Chapkin RS, Earnest DJ. 2016. Role of Inflammatory Signaling in the  
613 Differential Effects of Saturated and Poly-unsaturated Fatty Acids on Peripheral  
614 Circadian Clocks. *EBioMedicine* **7**:100–111. doi:10.1016/j.ebiom.2016.03.037
- 615 Kochanek KD, Murphy SL, Xu J, Arias E. 2017. Deaths: Final Data for 2017. *Natl Vital Stat Rep*  
616 **68**:1–77.
- 617 Kumar V, Kim K, Joseph C, Kourrich S, Yoo S-H, Huang HC, Vitaterna MH, de Villena FP-M,  
618 Churchill G, Bonci A, Takahashi JS. 2013. C57BL/6N mutation in cytoplasmic FMRP  
619 interacting protein 2 regulates cocaine response. *Science* **342**:1508–1512.  
620 doi:10.1126/science.1245503
- 621 Li B, Dewey CN. 2011. RSEM: accurate transcript quantification from RNA-Seq data with or  
622 without a reference genome 16.
- 623 Logan RW, Robledo RF, Recla JM, Philip VM, Bubier JA, Jay JJ, Harwood C, Wilcox T, Gatti DM,  
624 Bult CJ, Churchill GA, Chesler EJ. 2013. High-precision genetic mapping of behavioral  
625 traits in the diversity outbred mouse population: Genetic mapping of behavioral traits in  
626 the outbred mouse. *Genes Brain Behav* **12**:424–437. doi:10.1111/gbb.12029
- 627 Logan RW, Williams III WP, McClung CA. 2014. Circadian rhythms and addiction: Mechanistic  
628 insights and future directions. *Behav Neurosci* **128**:387–412.
- 629 McCutcheon JE, Wang X, Tseng KY, Wolf ME, Marinelli M. 2011. Calcium-Permeable AMPA  
630 Receptors Are Present in Nucleus Accumbens Synapses after Prolonged Withdrawal  
631 from Cocaine Self-Administration But Not Experimenter-Administered Cocaine. *J*  
632 *Neurosci* **31**:5737–5743. doi:10.1523/JNEUROSCI.0350-11.2011
- 633 National Advisory Mental Health Council Workgroup on Genomics. 2018. Report of the National  
634 Advisory Mental Health Council Workgroup on Genomics.
- 635 Nestler EJ, Hyman SE. 2010. Animal models of neuropsychiatric disorders. *Nat Neurosci*  
636 **13**:1161–1169. doi:10.1038/nn.2647
- 637 Neuner SM, Heuer SE, Huentelman MJ, O’Connell KMS, Kaczorowski CC. 2019. Harnessing  
638 Genetic Complexity to Enhance Translatability of Alzheimer’s Disease Mouse Models: A  
639 Path toward Precision Medicine. *Neuron* **101**:399–411.e5.  
640 doi:10.1016/j.neuron.2018.11.040
- 641 Ozburn AR, Falcon E, Twaddle A, Nugent AL, Gillman AG, Spencer SM, Arey RN, Mukherjee S,  
642 Lyons-Weiler J, Self DW, McClung CA. 2015. Direct Regulation of Diurnal *Drd3* Expression  
643 and Cocaine Reward by NPAS2. *Biol Psychiatry* **77**:425–433.  
644 doi:10.1016/j.biopsych.2014.07.030
- 645 Palmer RHC, Benca-Bachman CE, Bubier JA, McGeary JE, Ramgiri N, Srijevanthan J, Huggett SB,  
646 Yang Jingjing, Visscher P, Yang Jian, Knopik V, Chesler EJ. 2019. Cross-Species Integration  
647 of Transcriptomic Effects of Tobacco and Nicotine Exposure Helps to Prioritize Genetic  
648 Effects on Human Tobacco Consumption | bioRxiv. *bioRxiv*.

- 649 Pascoli V, Hiver A, Van Zessen R, Loureiro M, Achargui R, Harada M, Flakowski J, Lüscher C.  
650 2018. Stochastic synaptic plasticity underlying compulsion in a model of addiction.  
651 *Nature* **564**:366–371. doi:10.1038/s41586-018-0789-4
- 652 Philip VM, Sokoloff G, Ackert-Bicknell CL, Striz M, Branstetter L, Beckmann MA, Spence JS,  
653 Jackson BL, Galloway LD, Barker P, and Wymore AM, Hunsicker PR, Durtschi DC, Shaw  
654 GS, Shinpock S, Manly KF, Miller DR, Donohue KD, Culiati CT, Churchill GA, Lariviere WR,  
655 Palmer AA, O’Hara BF, Voy BH, Chesler EJ. 2011. Genetic analysis in the Collaborative  
656 Cross breeding population. *Genome Res* **21**:1223–1238.
- 657 Phipson B, Lee S, Majewski IJ, Alexander WS, Smyth GK. 2016. Robust Hyperparameter  
658 Estimation Protects Against Hypervariable Genes and Improves Power to Detect  
659 Differential Expression. *Ann Appl Stat* **10**:946–963. doi:10.1214/16-AOAS920
- 660 Piazza PV, Deroche-Gamonet V, Rouge-Pont F, Le Moal M. 2000. Vertical Shifts in Self-  
661 Administration Dose–Response Functions Predict a Drug-Vulnerable Phenotype  
662 Predisposed to Addiction. *J Neurosci* **20**:4226–4232. doi:10.1523/JNEUROSCI.20-11-  
663 04226.2000
- 664 Prendergast BJ, Onishi KG, Zucker I. 2014. Female mice liberated for inclusion in neuroscience  
665 and biomedical research. *Neurosci Biobehav Rev* **40**:1–5.
- 666 Ramanathan C, Xu H, Khan SK, Shen Y, Gitis PJ, Welsh DK, Hogenesch JB, Liu AC. 2014. Cell Type-  
667 Specific Functions of Period Genes Revealed by Novel Adipocyte and Hepatocyte  
668 Circadian Clock Models. *PLoS Genet* **10**:e1004244. doi:10.1371/journal.pgen.1004244
- 669 Ritchie ME, Phipson B, Wu D, Hu Y, Law CW, Shi W, Smyth GK. 2015. limma powers differential  
670 expression analyses for RNA-sequencing and microarray studies. *Nucleic Acids Res*  
671 **43**:e47–e47. doi:10.1093/nar/gkv007
- 672 Roberts A, De Villena FP-M, Wang W, McMillan L, Threadgill DW. 2007. The polymorphism  
673 architecture of mouse genetic resources elucidated using genome-wide resequencing  
674 data: implications for QTL discovery and systems genetics. *Mamm Genome* **18**:473–481.
- 675 Ruan QT, Yazdani N, Blum BC, Beierle JA, Lin W, Coelho MA, Fultz EK, Healy AF, Shahin JR,  
676 Kandola AK, Luttik KP, Zheng K, Smith NJ, Cheung J, Mortazavi F, Apicco DJ, Ragu Varman  
677 D, Ramamoorthy S, Ash PEA, Rosene DL, Emili A, Wolozin B, Szumlinski KK, Bryant CD.  
678 2020. A Mutation in Hnrnp1 That Decreases Methamphetamine-Induced  
679 Reinforcement, Reward, and Dopamine Release and Increases Synaptosomal hnRNP H  
680 and Mitochondrial Proteins. *J Neurosci* **40**:107–130. doi:10.1523/JNEUROSCI.1808-  
681 19.2019
- 682 SAMHSA. 2017. The 2017 National Survey on Drug Use and Health (NSDUH).
- 683 Sathyanesan M, Girgenti MJ, Banasr M, Stone K, Bruce C, Guilchicek E, Wilczak-Havill K, Nairn A,  
684 Williams K, Sass S, Duman JG, Newton SS. 2012. A molecular characterization of the  
685 choroid plexus and stress-induced gene regulation. *Transl Psychiatry* **2**:e139.  
686 doi:10.1038/tp.2012.64

- 687 Saul MC, Blatti C, Yang W, Bukhari SA, Shpigler HY, Troy JM, Seward CH, Sloofman L,  
688 Chandrasekaran S, Bell AM, Stubbs L, Robinson GE, Zhao SD, Sinha S. 2019a. Cross-  
689 species systems analysis of evolutionary toolkits of neurogenomic response to social  
690 challenge. *Genes Brain Behav* **18**:e12502. doi:10.1111/gbb.12502
- 691 Saul MC, Philip VM, Reinholdt LG, Chesler EJ. 2019b. High-Diversity Mouse Populations for  
692 Complex Traits. *Trends Genet* **0**. doi:10.1016/j.tig.2019.04.003
- 693 Schoenrock SA, Kumar P, Gómez-A A, Dickson PE, Kim S-M, Bailey L, Neira S, Riker KD,  
694 Farrington J, Gaines CH, Khan S, Wilcox TD, Roy TA, Leonardo MR, Olson AA, Gagnon LH,  
695 Philip VM, Valdar W, de Villena FP-M, Jentsch JD, Logan RW, McClung CA, Robinson DL,  
696 Chesler EJ, Tarantino LM. 2020. Characterization of genetically complex Collaborative  
697 Cross mouse strains that model divergent locomotor activating and reinforcing  
698 properties of cocaine. *Psychopharmacology (Berl)*. doi:10.1007/s00213-019-05429-3
- 699 Seok J, Warren HS, Cuenca AG, Mindrinos MN, Baker HV, Xu W, Richards DR, McDonald-Smith  
700 GP, Gao H, Hennessy L, others. 2013. Genomic responses in mouse models poorly mimic  
701 human inflammatory diseases. *Proc Natl Acad Sci* **110**:3507–3512.
- 702 Sinha S, Jones BM, Traniello IM, Bukhari SA, Halfon MS, Hofmann HA, Huang S, Katz PS, Keagy J,  
703 Lynch VJ, Sokolowski MB, Stubbs LJ, Tabe-Bordbar S, Wolfner MF, Robinson GE. 2020.  
704 Behavior-related gene regulatory networks: A new level of organization in the brain.  
705 *Proc Natl Acad Sci* 201921625. doi:10.1073/pnas.1921625117
- 706 Sittig LJ, Carbonetto P, Engel KA, Krauss KS, Barrios-Camacho CM, Palmer AA. 2016. Genetic  
707 Background Limits Generalizability of Genotype-Phenotype Relationships. *Neuron*  
708 **91**:1253–1259. doi:10.1016/j.neuron.2016.08.013
- 709 Soneson C, Love M, Robinson M. 2016. Differential analyses for RNA-seq: transcript-level  
710 estimates improve gene-level inferences. *F1000Research* **4**.  
711 doi:10.12688/f1000research.7563.2
- 712 Storey JD, Tibshirani R. 2003. Statistical significance for genomewide studies. *Proc Natl Acad Sci*  
713 **100**:9440–9445. doi:10.1073/pnas.1530509100
- 714 Takao K, Miyakawa T. 2015. Genomic responses in mouse models greatly mimic human  
715 inflammatory diseases. *Proc Natl Acad Sci* **112**:1167–1172.
- 716 Tuttle AH, Philip VM, Chesler EJ, Mogil JS. 2018. Comparing phenotypic variation between  
717 inbred and outbred mice. *Nat Methods* **15**:994–996.
- 718 Wahlsten D, Metten P, Crabbe J. 2003. A rating scale for wildness and ease of handling  
719 laboratory mice: results for 21 inbred strains tested in two laboratories. *Genes Brain*  
720 *Behav* **2**:71–79.
- 721 Walker DM, Cates HM, Loh Y-HE, Purushothaman I, Ramakrishnan A, Cahill KM, Lardner CK,  
722 Godino A, Kronman HG, Rabkin J, Lorsch ZS, Mews P, Doyle MA, Feng J, Labonté B, Koo  
723 JW, Bagot RC, Logan RW, Seny ML, Calipari ES, Shen L, Nestler EJ. 2018. Cocaine self-  
724 administration alters transcriptome-wide responses in the brain's reward circuitry. *Biol*  
725 *Psychiatry*.

- 726 Wiltshire T, Ervin RB, Duan H, Bogue MA, Zamboni WC, Cook S, Chung W, Zou F, Tarantino LM.  
727 2015. Initial locomotor sensitivity to cocaine varies widely among inbred mouse strains:  
728 Initial locomotor sensitivity to cocaine in inbred mice. *Genes Brain Behav* **14**:271–280.  
729 doi:10.1111/gbb.12209
- 730 Young RL, Ferkin MH, Ockendon-Powell NF, Orr VN, Phelps SM, Pogány Á, Richards-Zawacki CL,  
731 Summers K, Székely T, Trainor BC, Urrutia AO, Zachar G, O’Connell LA, Hofmann HA.  
732 2019. Conserved transcriptomic profiles underpin monogamy across vertebrates. *Proc*  
733 *Natl Acad Sci* **116**:1331–1336. doi:10.1073/pnas.1813775116
- 734
